# Supplementary material for: The Psychopathology of Worthlessness in Depression
Source: Front Psychiatry. 2022 May 19;13:818542. doi: 10.3389/fpsyt.2022.818542 (PMC9160466; doi:10.3389/fpsyt.2022.818542)
Supplement: Supplementary file 2 [file Data_Sheet_2.xlsx]

## Sheet: Phi Study 1
	LO	WR	HL	GU	CR	NI	LS	LE	FT	SB	SU	EF	BL	WL
LO		0.423247	0.290727	0.222277	0.249417	0.313948	0.164801	0.278596	0.214472	0.345668	0.173306	0.248952	0.568618	0.300718
WR	0.423247		0.356539	0.256076	0.247989	0.3238	0.171608	0.306429	0.261834	0.408564	0.20159	0.330509	0.505599	0.346518
HL	0.290727	0.356539		0.264182	0.170782	0.30444	0.154329	0.278929	0.222782	0.299009	0.248037	0.37595	0.351159	0.516907
GU	0.222277	0.256076	0.264182		0.125716	0.195858	0.128677	0.202548	0.217954	0.273942	0.241728	0.244503	0.260747	0.297492
CR	0.249417	0.247989	0.170782	0.125716		0.15252	0.14521	0.182997	0.165897	0.22028	0.137808	0.160346	0.245975	0.172803
NI	0.313948	0.3238	0.30444	0.195858	0.15252		0.223119	0.299118	0.193907	0.264943	0.187497	0.270764	0.351029	0.292608
LS	0.164801	0.171608	0.154329	0.128677	0.14521	0.223119		0.201214	0.135359	0.165998	0.123187	0.139967	0.178326	0.150093
LE	0.278596	0.306429	0.278929	0.202548	0.182997	0.299118	0.201214		0.204364	0.276189	0.172214	0.268783	0.332612	0.267745
FT	0.214472	0.261834	0.222782	0.217954	0.165897	0.193907	0.135359	0.204364		0.233836	0.21172	0.242836	0.255597	0.235404
SB	0.345668	0.408564	0.299009	0.273942	0.22028	0.264943	0.165998	0.276189	0.233836		0.170192	0.276864	0.375966	0.318771
SU	0.173306	0.20159	0.248037	0.241728	0.137808	0.187497	0.123187	0.172214	0.21172	0.170192		0.203287	0.219691	0.270557
EF	0.248952	0.330509	0.37595	0.244503	0.160346	0.270764	0.139967	0.268783	0.242836	0.276864	0.203287		0.322563	0.397709
BL	0.568618	0.505599	0.351159	0.260747	0.245975	0.351029	0.178326	0.332612	0.255597	0.375966	0.219691	0.322563		0.348633
WL	0.300718	0.346518	0.516907	0.297492	0.172803	0.292608	0.150093	0.267745	0.235404	0.318771	0.270557	0.397709	0.348633

## Sheet: Net Study 1
	LO	WR	HL	GU	CR	NI	LS	LE	FT	SB	SU	EF	BL	WL
LO		0.8392	0.251345	0.376307	0.768315	0.742947	0.20006	0.363799	0.347603	0.702061	0	0	2.53187	0.539059
WR	0.8392		0.738976	0.43684	0.622297	0.594753	0.148835	0.463498	0.775021	1.1778	0.334809	0.865899	1.45989	0.43334
HL	0.251345	0.738976		0.393316	0.103596	0.645457	0.164832	0.50574	0.155317	0.351884	0.69782	0.958474	0.398753	2.25759
GU	0.376307	0.43684	0.393316		0	0.0983186	0.289267	0.296558	0.59637	1.04454	0.990559	0.305353	0.296462	0.773953
CR	0.768315	0.622297	0.103596	0		0	0.536888	0.373079	0.482231	0.537648	0.456114	0.105547	0.322352	0.0915874
NI	0.742947	0.594753	0.645457	0.0983186	0		0.95015	0.860144	0.192601	0.313243	0.411392	0.477733	0.617196	0.414279
LS	0.20006	0.148835	0.164832	0.289267	0.536888	0.95015		0.725558	0.38058	0.306336	0.430165	0.103169	0.10947	0.0880604
LE	0.363799	0.463498	0.50574	0.296558	0.373079	0.860144	0.725558		0.419198	0.543433	0.24565	0.605161	0.65172	0.239819
FT	0.347603	0.775021	0.155317	0.59637	0.482231	0.192601	0.38058	0.419198		0.597667	0.695175	0.548186	0.329488	0.199145
SB	0.702061	1.1778	0.351884	1.04454	0.537648	0.313243	0.306336	0.543433	0.597667		0	0.428017	0.507901	0.659836
SU	0	0.334809	0.69782	0.990559	0.456114	0.411392	0.430165	0.24565	0.695175	0		0	0.465227	0.922013
EF	0	0.865899	0.958474	0.305353	0.105547	0.477733	0.103169	0.605161	0.548186	0.428017	0		0.469173	1.15828
BL	2.53187	1.45989	0.398753	0.296462	0.322352	0.617196	0.10947	0.65172	0.329488	0.507901	0.465227	0.469173		0.213369
WL	0.539059	0.43334	2.25759	0.773953	0.0915874	0.414279	0.0880604	0.239819	0.199145	0.659836	0.922013	1.15828	0.213369

## Sheet: Phi Study 2
	LO	WR	HL	GU	CR	NI	LS	LE	FT	SB	SU	EF	BL	WL
LO		0.564095	0.48846	0.430879	0.487371	0.52324	0.368016	0.490918	0.403536	0.498996	0.355406	0.494148	0.599559	0.49769
WR	0.564095		0.535832	0.445066	0.526192	0.549861	0.395288	0.541301	0.370469	0.576136	0.440374	0.539861	0.611824	0.545168
HL	0.48846	0.535832		0.47507	0.49457	0.633927	0.378086	0.458962	0.320093	0.512651	0.560958	0.570675	0.600404	0.65308
GU	0.430879	0.445066	0.47507		0.398645	0.415448	0.292946	0.370806	0.329517	0.480846	0.39515	0.424566	0.452539	0.51171
CR	0.487371	0.526192	0.49457	0.398645		0.491023	0.325915	0.431556	0.373809	0.502647	0.440094	0.514286	0.509619	0.497661
NI	0.52324	0.549861	0.633927	0.415448	0.491023		0.460216	0.573595	0.332008	0.508907	0.466864	0.566986	0.605236	0.59094
LS	0.368016	0.395288	0.378086	0.292946	0.325915	0.460216		0.450818	0.314535	0.329053	0.321149	0.393718	0.430571	0.397219
LE	0.490918	0.541301	0.458962	0.370806	0.431556	0.573595	0.450818		0.331717	0.43985	0.366399	0.483159	0.573831	0.434761
FT	0.403536	0.370469	0.320093	0.329517	0.373809	0.332008	0.314535	0.331717		0.404156	0.215232	0.365931	0.356756	0.34642
SB	0.498996	0.576136	0.512651	0.480846	0.502647	0.508907	0.329053	0.43985	0.404156		0.450986	0.531236	0.523075	0.529165
SU	0.355406	0.440374	0.560958	0.39515	0.440094	0.466864	0.321149	0.366399	0.215232	0.450986		0.514063	0.481279	0.529312
EF	0.494148	0.539861	0.570675	0.424566	0.514286	0.566986	0.393718	0.483159	0.365931	0.531236	0.514063		0.593098	0.586139
BL	0.599559	0.611824	0.600404	0.452539	0.509619	0.605236	0.430571	0.573831	0.356756	0.523075	0.481279	0.593098		0.580523
WL	0.49769	0.545168	0.65308	0.51171	0.497661	0.59094	0.397219	0.434761	0.34642	0.529165	0.529312	0.586139	0.580523

## Sheet: Net Study 2
	LO	WR	HL	GU	CR	NI	LS	LE	FT	SB	SU	EF	BL	WL
LO		0.73482	0	0.268473	0.440389	0.356245	0	0.335062	0.761624	0.35076	0	0.0979505	1.14469	0.161179
WR	0.73482		0.154194	0.206561	0.687273	0.213968	0	0.669608	0	1.07731	0	0.38349	0.730132	0.379168
HL	0	0.154194		0.597245	0.282568	1.3503	0	0	0	0.19733	1.51362	0.481734	0.664509	1.27835
GU	0.268473	0.206561	0.597245		0	0	0	0	0	0.753865	0	0	0.26947	0.90156
CR	0.440389	0.687273	0.282568	0		0.24583	0	0	0.504127	0.509313	0.391435	0.491656	0.243884	0.223039
NI	0.356245	0.213968	1.3503	0	0.24583		0.660265	1.10728	0	0.313512	0	0.515456	0.495963	0.643372
LS	0	0	0	0	0	0.660265		0.666354	0.442421	0	0	0.146593	0.272978	0.199685
LE	0.335062	0.669608	0	0	0	1.10728	0.666354		0	0	0	0.344701	0.877894	0
FT	0.761624	0	0	0	0.504127	0	0.442421	0		0.855747	0	0.277801	0	0
SB	0.35076	1.07731	0.19733	0.753865	0.509313	0.313512	0	0	0.855747		0.370729	0.52191	0.109437	0.300092
SU	0	0	1.51362	0	0.391435	0	0	0	0	0.370729		0.697978	0.425114	0.654472
EF	0.0979505	0.38349	0.481734	0	0.491656	0.515456	0.146593	0.344701	0.277801	0.52191	0.697978		0.856691	0.709905
BL	1.14469	0.730132	0.664509	0.26947	0.243884	0.495963	0.272978	0.877894	0	0.109437	0.425114	0.856691		0.373047
WL	0.161179	0.379168	1.27835	0.90156	0.223039	0.643372	0.199685	0	0	0.300092	0.654472	0.709905	0.373047
